# Supplementary material for: Oral Carriage of Streptococcus mutans Harboring the cnm Gene Relates to an Increased Incidence of Cerebral Microbleeds
Source: PubMed Central journal article supplement — Stroke. 2020 Nov 5;51(12):3632–9. doi: 10.1161/STROKEAHA.120.029607 (PMC7678651; doi:10.1161/strokeaha.120.029607), 2020-11-05
Supplement: str-51-3632-s001.pdf [file str-51-3632-s001.pdf]

## SUPPLEMENTAL MATERIAL

### **Oral carriage of *Streptococcus mutans* harboring the *cnm* gene relates to an increased incidence of cerebral microbleeds**

Satoshi Hosoki, Satoshi Saito, Shuichi Tonomura, Hiroyuki Ishiyama, Takeshi Yoshimoto, Shuhei Ikeda, Hajime Ikenouchi, Yumi Yamamoto, Yorito Hattori, Kaori Miwa, Robert P. Friedland, Roxana O. Carare, Jin Nakahara, Norihiro Suzuki, Masatoshi Koga, Kazunori Toyoda, Ryota Nomura, Kazuhiko Nakano, Misa Takegami, Masafumi Ihara

#### **Corresponding Authors:**

Satoshi Saito (saitou.satoshi.43m@kyoto-u.jp)

Masafumi Ihara (ihara@ncvc.go.jp)

Department of Neurology, National Cerebral and Cardiovascular Center  
6-1 Kishibe-Shimmachi, Suita, Osaka, 564-8565, Japan  
Phone +81-6-6170-1069

## Supplemental Tables

**Supplemental Table I. Characteristics of subjects receiving oral bacterial examination**

|                            | <u>All acute stroke subjects (n = 3782)</u> |                                              | p value |
|----------------------------|---------------------------------------------|----------------------------------------------|---------|
|                            | Oral bacterial examination (+)<br>(n = 404) | Oral bacterial examination (-)<br>(n = 3378) |         |
| Age, y                     | 73.0 (64.0–81.0)                            | 76.0 (67.0–83.0)                             | < 0.001 |
| Male, n (%)                | 253 (63)                                    | 2033 (60)                                    | 0.343   |
| Hypertension, n (%)        | 351 (87)                                    | 2897 (86)                                    | 0.541   |
| SBP (mmHg)†                | 123 (114–134)                               | 123 (112–133)                                | 0.570   |
| DBP (mmHg)†                | 70 (63–79)                                  | 70 (63–80)                                   | 0.691   |
| Diabetes mellitus, n (%)   | 53 (13)                                     | 472 (14)                                     | 0.639   |
| Dyslipidemia, n (%)        | 217 (54)                                    | 1740 (52)                                    | 0.402   |
| Atrial fibrillation, n (%) | 97 (24)                                     | 808 (24)                                     | 0.968   |
| Smoking, n (%)             | 186 (46)                                    | 1540 (46)                                    | 0.864   |
| NIHSS‡                     | 3.0 (1.0–7.0)                               | 4.0 (1.0–14.0)                               | < 0.001 |
| mRS§                       | 2.0 (1.0–4.0)                               | 2.0 (1.0–4.0)                                | 0.005   |

Data represent median (interquartile range) or number (percent). †Systolic blood pressure (SBP) and diastolic blood pressure (DBP) at discharge was described in 402 subjects receiving oral bacterial examination and 3244 without. Those who died in hospital were excluded. ‡National Institutes of Health Stroke Scale (NIHSS) was measured on admission. §Lower scores of modified Rankin Scale (mRS) at discharge were observed in subjects receiving oral bacterial examination.

**Supplemental Table II. Clinical profiles in the three groups**

|                            | <i>cnm</i> -positive<br><i>S. mutans</i> (+) (n = 21) | <i>cnm</i> -negative<br><i>S. mutans</i> (+) (n = 69) | <i>S. mutans</i> (-) (n = 21) | p value |
|----------------------------|-------------------------------------------------------|-------------------------------------------------------|-------------------------------|---------|
| Age, y                     | 73.0 (63.0–78.0)                                      | 69.0 (63.0–81.0)                                      | 75.0 (65.5–80.0)              | 0.531   |
| Male, n (%)                | 14 (67)                                               | 42 (61)                                               | 12 (57)                       | 0.822   |
| Hypertension, n (%)        | 18 (86)                                               | 55 (80)                                               | 17 (81)                       | 0.940   |
| SBP (mmHg)                 | 126 (116–134)                                         | 131 (118–150)                                         | 125 (110–144)                 | 0.310   |
| DBP (mmHg)                 | 76 (64–85)                                            | 75 (65–85)                                            | 70 (62–87)                    | 0.701   |
| Diabetes mellitus, n (%)   | 3 (14)                                                | 17 (25)                                               | 5 (24)                        | 0.654   |
| Dyslipidemia, n (%)        | 13 (62)                                               | 40 (58)                                               | 12 (57)                       | 0.963   |
| Renal impairment, n (%)    | 10 (48)                                               | 30 (43)                                               | 11 (52)                       | 0.798   |
| Atrial fibrillation, n (%) | 2 (10)                                                | 7 (10)                                                | 6 (29)                        | 0.136   |
| ATA use, n (%)             | 15 (71)                                               | 55 (80)                                               | 18 (86)                       | 0.564   |
| Antiplatelet agents, n (%) | 12 (57)                                               | 43 (62)                                               | 11 (52)                       | 0.735   |
| Anticoagulants, n (%)      | 5 (24)                                                | 16 (23)                                               | 7 (33)                        | 0.670   |
| ≥ 2 ATA use, n (%)         | 2 (10)                                                | 12 (17)                                               | 3 (14)                        | 0.810   |
| Recent IS, n (%)           | 7 (33)                                                | 25 (36)                                               | 6 (29)                        | 0.883   |
| Recent TIA, n (%)          | 1 (5)                                                 | 9 (13)                                                | 1 (5)                         | 0.475   |
| Recent ICH, n (%)          | 1 (5)                                                 | 6 (9)                                                 | 1 (5)                         | 1.000   |
| Previous IS, n (%)         | 13 (62)                                               | 29 (42)                                               | 13 (62)                       | 0.131   |
| Previous TIA, n (%)        | 0 (0)                                                 | 4 (6)                                                 | 1 (5)                         | 0.820   |
| Previous ICH, n (%)        | 5 (24)                                                | 9 (13)                                                | 1 (5)                         | 0.206   |
| Smoking, n (%)             | 10 (48)                                               | 33 (48)                                               | 9 (43)                        | 0.963   |
| mRS                        | 1.0 (0–3.5)                                           | 1.0 (0–3.0)                                           | 1.0 (0–1.5)                   | 0.218   |
| CRP (mg/dL)†               | 0.15 (0.04–0.79)                                      | 0.08 (0.04–0.26)                                      | 0.08 (0.03–0.18)              | 0.347   |
| Fibrinogen (mg/dL)‡        | 344 (274–415)                                         | 305 (271–345)                                         | 359 (282–433)                 | 0.135   |
| CMB, n (%)                 | 12 (57)                                               | 32 (46)                                               | 6 (29)                        | 0.171   |
| Lacunar infarcts, n (%)    | 13 (62)                                               | 21 (30)                                               | 7 (33)                        | 0.033   |
| PVH = 3, n (%)             | 8 (38)                                                | 8 (12)                                                | 5 (24)                        | 0.022   |
| DWMH ≥ 2, n (%)            | 16 (76)                                               | 43 (62)                                               | 6 (29)                        | 0.004   |
| Total SVD severity         | 3.0 (1.0–3.0)                                         | 1.0 (1.0–2.0)                                         | 1.0 (0–2.0)                   | 0.008   |

Data represent median (interquartile range) or number (percent). †CRP data was missing in 1 subject with *cnm*-negative *S. mutans*. ‡Fibrinogen was obtained 18 subjects with *cnm*-positive *S. mutans*, 62 with *cnm*-negative *S. mutans*, 8 without *S. mutans*. ATA indicates anti-thrombotic agents; IS, ischemic stroke; TIA, transient ischemic attack; ICH, intracerebral hemorrhage; CRP, C-reactive protein; CMB, cerebral microbleeds; PVH, periventricular hyperintensities; DWMH, deep white matter hyperintensities; SVD, small vessel disease.

**Supplemental Table III. Incidence rate ratios of newly-developed CMB in the three groups**

|                                           | <u>Unadjusted</u> |         | <u>Adjusted*</u> |         |
|-------------------------------------------|-------------------|---------|------------------|---------|
|                                           | IRR (95% CI)      | p value | IRR (95% CI)     | p value |
| <i>cnm</i> -positive <i>S. mutans</i> (+) | 4.1 (1.5–11.0)    | 0.005   | 3.9 (1.5–9.9)    | 0.004   |
| <i>cnm</i> -negative <i>S. mutans</i> (+) | reference         |         | reference        |         |
| <i>S. mutans</i> (–)                      | 0.2 (0.0–3.4)     | 0.275   | 0.2 (0.0–3.2)    | 0.278   |

IRR of newly-developed CMB in any brain region are shown. Subjects with *cnm*-positive *S. mutans* and without *S. mutans* were compared to those with *cnm*-negative *S. mutans*. \* Adjusted for age, sex, hypertension and renal impairment. IRR indicates incidence rate ratios; 95% CI, 95% confidence interval.

## Supplemental Figures

### Supplemental Figure I. Flow diagram of subject selection

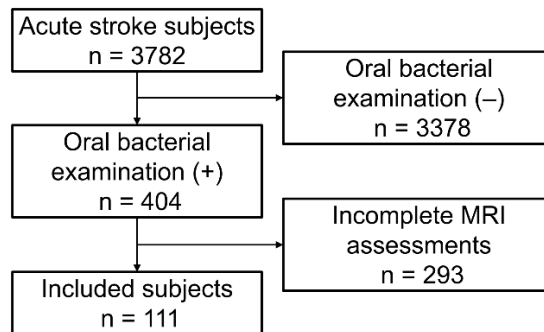

Subjects who satisfied the following criteria were included in the study: (1) subjects who developed acute ischemic stroke, transient ischemic attack or intracerebral hemorrhage from February 15th 2014 to April 8th 2018, (2) subjects who signed an informed consent form for the current research, including receiving oral bacterial assessments from February 15th 2014 to April 30th 2018 and (3) subjects receiving 3 Tesla MRI scans twice with more than a 180-day interval from February 15th 2014 to February 15th 2019.

**Supplemental Figure II. Representative images showing an increase in deep CMB**

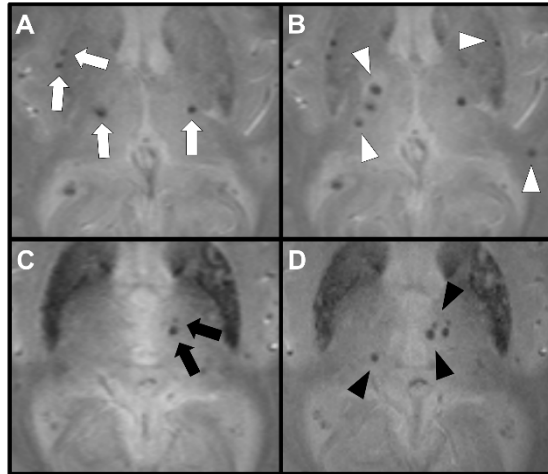

Head MRI gradient echo T2\*-weighted images of subjects with *cnm*-positive *S. mutans*. (A and B) 72-year-old woman. (C and D) 82-year-old woman. (A) Baseline MRI. Four CMB: two in the right putamen and two in the bilateral thalamus (white arrows). (B) Follow-up MRI at six months later than A. Four newly developed CMB: two in the right thalamus, one in the left temporal lobe and one in the left putamen (white arrowheads). (C) Baseline MRI. Two CMB in the left thalamus (black arrows). (D) Follow-up MRI at seventeen months later than C. Three newly developed CMB: one in the right thalamus and two in the left thalamus (black arrowheads).
