# Supplementary material for: Oral Carriage of Streptococcus mutans Harboring the cnm Gene Relates to an Increased Incidence of Cerebral Microbleeds
Source: PubMed Central journal article supplement — Stroke. 2020 Nov 5;51(12):3632–9. doi: 10.1161/STROKEAHA.120.029607 (PMC7678651; doi:10.1161/strokeaha.120.029607), 2020-11-05
Supplement: str-51-3632-s003.pdf [file str-51-3632-s003.pdf]

## Change of Authorship Form

(Must be completed and signed by ALL authors)

Please check all that apply

New author(s) have been added (in addition to this form, all new authors must complete the copyright transfer agreement and conflict of interest disclosure.

Change in order of authorship.

An author wishes to remove his/her name. An author's name may only be removed his/her own request and a letter signed by the author should accompany this form

Manuscript Number STROKE/2020/029607R1

Manuscript Title Oral carriage of Streptococcus mutans harboring the cnm gene relates to an increased incidence of cerebral microbleeds

### Former Authorship

Please list ALL AUTHORS in the same order as the original submission. For more than 12, use an extra sheet.

#### Print Name

Name (1) Satoshi Hosoki  
Name (2) Satoshi Saito  
Name (3) Shuichi Tonomura  
Name (4) Hiroyuki Ishiyama  
Name (5) Takeshi Yoshimoto  
Name (6) Shuhei Ikeda

#### Print Name

Name (7) Yumi Yamamoto  
Name (8) Yorito Hattori  
Name (9) Kaori Miwa  
Name (10) Robert P. Friedland  
Name (11) Jin Nakahara  
Name (12) Norihiro Suzuki

### New Authorship

All authors must sign below agreeing to the changes in authorship. The authorship order must reflect the authorship order of the manuscript.

|                                      |                                    |                     |
|--------------------------------------|------------------------------------|---------------------|
| Name (1) <u>Satoshi Hosoki</u>       | Signature <u>Satoshi Hosoki</u>    | Date <u>6/19/20</u> |
| Name (2) <u>Satoshi Saito</u>        | Signature _____                    | Date _____          |
| Name (3) <u>Shuichi Tonomura</u>     | Signature _____                    | Date _____          |
| Name (4) <u>Hiroyuki Ishiyama</u>    | Signature <u>Hiroyuki Ishiyama</u> | Date <u>6/19/20</u> |
| Name (5) <u>Takeshi Yoshimoto</u>    | Signature <u>Takeshi Yoshimoto</u> | Date <u>6/19/20</u> |
| Name (6) <u>Shuhei Ikeda</u>         | Signature <u>Shuhei Ikeda</u>      | Date <u>6/19/20</u> |
| Name (7) <u>Hajime Ikenouchi</u>     | Signature <u>Hajime Ikenouchi</u>  | Date <u>6/19/20</u> |
| Name (8) <u>Yumi Yamamoto</u>        | Signature _____                    | Date _____          |
| Name (9) <u>Yorito Hattori</u>       | Signature <u>Yorito Hattori</u>    | Date <u>6/19/20</u> |
| Name (10) <u>Kaori Miwa</u>          | Signature <u>Kaori Miwa</u>        | Date <u>6/19/20</u> |
| Name (11) <u>Robert P. Friedland</u> | Signature _____                    | Date _____          |
| Name (12) <u>Roxana O. Carare</u>    | Signature _____                    | Date _____          |

Please scan and email to [stroke@strokeahajournal.org](mailto:stroke@strokeahajournal.org).

## Change of Authorship Form

(Must be completed and signed by ALL authors)

Please check all that apply

New author(s) have been added (in addition to this form, all new authors must complete the copyright transfer agreement and conflict of interest disclosure.

Change in order of authorship.

An author wishes to remove his/her name. An author's name may only be removed his/her own request and a letter signed by the author should accompany this form

Manuscript Number STROKE/2020/029807R1

Manuscript Title Oral carriage of Streptococcus mutans harboring the crm gene relates to an increased incidence of cerebral microbleeds

### Former Authorship

Please list ALL AUTHORS in the same order as the original submission. For more than 12, use an extra sheet.

#### Print Name

Name (1) Satoshi Hosoki  
Name (2) Satoshi Saito  
Name (3) Shuichi Tonomura  
Name (4) Hiroyuki Ishiyama  
Name (5) Takeshi Yoshimoto  
Name (6) Shuhei Ikeda

#### Print Name

Name (7) Yumi Yamamoto  
Name (8) Yorito Hattori  
Name (9) Kaori Miwa  
Name (10) Robert P. Friedland  
Name (11) Jin Nakahara  
Name (12) Norihiro Suzuki

### New Authorship

All authors must sign below agreeing to the changes in authorship. The authorship order must reflect the authorship order of the manuscript.

|                                      |                                |                        |
|--------------------------------------|--------------------------------|------------------------|
| Name (1) <u>Satoshi Hosoki</u>       | Signature _____                | Date _____             |
| Name (2) <u>Satoshi Saito</u>        | Signature <u>Satoshi Saito</u> | Date <u>19/06/2020</u> |
| Name (3) <u>Shuichi Tonomura</u>     | Signature _____                | Date _____             |
| Name (4) <u>Hiroyuki Ishiyama</u>    | Signature _____                | Date _____             |
| Name (5) <u>Takeshi Yoshimoto</u>    | Signature _____                | Date _____             |
| Name (6) <u>Shuhei Ikeda</u>         | Signature _____                | Date _____             |
| Name (7) <u>Hajime Ikenouchi</u>     | Signature _____                | Date _____             |
| Name (8) <u>Yumi Yamamoto</u>        | Signature _____                | Date _____             |
| Name (9) <u>Yorito Hattori</u>       | Signature _____                | Date _____             |
| Name (10) <u>Kaori Miwa</u>          | Signature _____                | Date _____             |
| Name (11) <u>Robert P. Friedland</u> | Signature _____                | Date _____             |
| Name (12) <u>Roxana O. Carare</u>    | Signature <u>Roxana</u>        | Date <u>19/06/2020</u> |

Please scan and email to [stroke@strokeahajournal.org](mailto:stroke@strokeahajournal.org).

## Change of Authorship Form

(Must be completed and signed by ALL authors)

Please check all that apply

New author(s) have been added (in addition to this form, all new authors must complete the copyright transfer agreement and conflict of interest disclosure.

Change in order of authorship.

An author wishes to remove his/her name. An author's name may only be removed his/her own request and a letter signed by the author should accompany this form

Manuscript Number STROKE/2020/029607R1

Manuscript Title Oral carriage of Streptococcus mutans harboring the cnm gene relates to an increased incidence of cerebral microbleeds

### Former Authorship

Please list ALL AUTHORS in the same order as the original submission. For more than 12, use an extra sheet.

#### Print Name

Name (1) Satoshi Hosoki  
Name (2) Satoshi Saito  
Name (3) Shuichi Tonomura  
Name (4) Hiroyuki Ishiyama  
Name (5) Takeshi Yoshimoto  
Name (6) Shuhei Ikeda

#### Print Name

Name (7) Yumi Yamamoto  
Name (8) Yorito Hattori  
Name (9) Kaori Miwa  
Name (10) Robert P. Friedland  
Name (11) Jin Nakahara  
Name (12) Norihiro Suzuki

### New Authorship

All authors must sign below agreeing to the changes in authorship. The authorship order must reflect the authorship order of the manuscript.

|                                      |                                   |                           |
|--------------------------------------|-----------------------------------|---------------------------|
| Name (1) <u>Satoshi Hosoki</u>       | Signature _____                   | Date _____                |
| Name (2) <u>Satoshi Saito</u>        | Signature _____                   | Date _____                |
| Name (3) <u>Shuichi Tonomura</u>     | Signature <u>Shuichi Tonomura</u> | Date <u>June /21/2020</u> |
| Name (4) <u>Hiroyuki Ishiyama</u>    | Signature _____                   | Date _____                |
| Name (5) <u>Takeshi Yoshimoto</u>    | Signature _____                   | Date _____                |
| Name (6) <u>Shuhei Ikeda</u>         | Signature _____                   | Date _____                |
| Name (7) <u>Hajime Ikenouchi</u>     | Signature _____                   | Date _____                |
| Name (8) <u>Yumi Yamamoto</u>        | Signature _____                   | Date _____                |
| Name (9) <u>Yorito Hattori</u>       | Signature _____                   | Date _____                |
| Name (10) <u>Kaori Miwa</u>          | Signature _____                   | Date _____                |
| Name (11) <u>Robert P. Friedland</u> | Signature _____                   | Date _____                |
| Name (12) <u>Roxana O. Carare</u>    | Signature _____                   | Date _____                |

Please scan and email to [stroke@strokeahajournal.org](mailto:stroke@strokeahajournal.org).

## Change of Authorship Form

---

(Must be completed and signed by ALL authors)

Please check all that apply

New author(s) have been added (in addition to this form, all new authors must complete the copyright transfer agreement and conflict of interest disclosure.

Change in order of authorship.

An author wishes to remove his/her name. An author's name may only be removed his/her own request and a letter signed by the author should accompany this form

Manuscript Number STROKE/2020/029607R1

Manuscript Title Oral carriage of Streptococcus mutans harboring the cnm gene relates to an increased incidence of cerebral microbleeds

### Former Authorship

Please list ALL AUTHORS in the same order as the original submission. For more than 12, use an extra sheet.

#### Print Name

Name (1) Satoshi Hosoki  
Name (2) Satoshi Saito  
Name (3) Shuichi Tonomura  
Name (4) Hiroyuki Ishiyama  
Name (5) Takeshi Yoshimoto  
Name (6) ShuheI Ikeda

#### Print Name

Name (7) Yumi Yamamoto  
Name (8) Yorito Hattori  
Name (9) Kaori Miwa  
Name (10) Robert P. Friedland  
Name (11) Jin Nakahara  
Name (12) Norihiro Suzuki

### New Authorship

All authors must sign below agreeing to the changes in authorship. The authorship order must reflect the authorship order of the manuscript.

|                                      |                       |                             |
|--------------------------------------|-----------------------|-----------------------------|
| Name (1) <u>Satoshi Hosoki</u>       | Signature _____       | Date _____                  |
| Name (2) <u>Satoshi Saito</u>        | Signature _____       | Date _____                  |
| Name (3) <u>Shuichi Tonomura</u>     | Signature _____       | Date _____                  |
| Name (4) <u>Hiroyuki Ishiyama</u>    | Signature _____       | Date _____                  |
| Name (5) <u>Takeshi Yoshimoto</u>    | Signature _____       | Date _____                  |
| Name (6) <u>ShuheI Ikeda</u>         | Signature _____       | Date _____                  |
| Name (7) <u>Hajime Ikenouchi</u>     | Signature _____       | Date _____                  |
| Name (8) <u>Yumi Yamamoto</u>        | Signature <u>山本由美</u> | Date <u>June 22nd, 2020</u> |
| Name (9) <u>Yorito Hattori</u>       | Signature _____       | Date _____                  |
| Name (10) <u>Kaori Miwa</u>          | Signature _____       | Date _____                  |
| Name (11) <u>Robert P. Friedland</u> | Signature _____       | Date _____                  |
| Name (12) <u>Roxana O. Carare</u>    | Signature _____       | Date _____                  |

Please scan and email to [stroke@strokeahajournal.org](mailto:stroke@strokeahajournal.org).

# Change of Authorship Form

(Must be completed and signed by ALL authors)

Please check all that apply

New author(s) have been added (in addition to this form, all new authors must complete the copyright transfer agreement and conflict of interest disclosure.

Change in order of authorship.

An author wishes to remove his/her name. An author's name may only be removed his/her own request and a letter signed by the author should accompany this form

Manuscript Number STROKE/2020/029607R1

Manuscript Title Oral carriage of Streptococcus mutans harboring the cnm gene relates to an increased incidence of cerebral microbleeds

## Former Authorship

Please list ALL AUTHORS in the same order as the original submission. For more than 12, use an extra sheet.

### Print Name

- Name (1) Satoshi Hosoki
- Name (2) Satoshi Saito
- Name (3) Shuichi Tonomura
- Name (4) Hiroyuki Ishiyama
- Name (5) Takeshi Yoshimoto
- Name (6) Shuhei Ikeda

### Print Name

- Name (7) Yumi Yamamoto
- Name (8) Yorito Hattori
- Name (9) Kaori Miwa
- Name (10) Robert P. Friedland
- Name (11) Jin Nakahara
- Name (12) Norihiro Suzuki

## New Authorship

All authors must sign below agreeing to the changes in authorship. The authorship order must reflect the authorship order of the manuscript.

|                                      |                                                                                                |                           |
|--------------------------------------|------------------------------------------------------------------------------------------------|---------------------------|
| Name (1) <u>Satoshi Hosoki</u>       | Signature _____                                                                                | Date _____                |
| Name (2) <u>Satoshi Saito</u>        | Signature _____                                                                                | Date _____                |
| Name (3) <u>Shuichi Tonomura</u>     | Signature _____                                                                                | Date _____                |
| Name (4) <u>Hiroyuki Ishiyama</u>    | Signature _____                                                                                | Date _____                |
| Name (5) <u>Takeshi Yoshimoto</u>    | Signature _____                                                                                | Date _____                |
| Name (6) <u>Shuhei Ikeda</u>         | Signature _____                                                                                | Date _____                |
| Name (7) <u>Hajime Ikenouchi</u>     | Signature _____                                                                                | Date _____                |
| Name (8) <u>Yumi Yamamoto</u>        | Signature _____                                                                                | Date _____                |
| Name (9) <u>Yorito Hattori</u>       | Signature _____                                                                                | Date _____                |
| Name (10) <u>Kaori Miwa</u>          | Signature _____                                                                                | Date _____                |
| Name (11) <u>Robert P. Friedland</u> | Signature 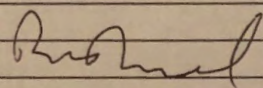 | Date <u>JUNE 19, 2020</u> |
| Name (12) <u>Roxana O. Carare</u>    | Signature _____                                                                                | Date _____                |

Please scan and email to [stroke@strokeahajournal.org](mailto:stroke@strokeahajournal.org).

## Change of Authorship Form

(Must be completed and signed by ALL authors)

Please check all that apply

New author(s) have been added (in addition to this form, all new authors must complete the copyright transfer agreement and conflict of interest disclosure.

Change in order of authorship.

An author wishes to remove his/her name. An author's name may only be removed his/her own request and a letter signed by the author should accompany this form

Manuscript Number STROKE/2020/029607R1

Manuscript Title Oral carriage of Streptococcus mutans harboring the cnm gene relates to an increased incidence of cerebral microbleeds

### Former Authorship

Please list ALL AUTHORS in the same order as the original submission. For more than 12, use an extra sheet.

#### Print Name

Name (1) Masatoshi Koga  
Name (2) Kazunori Toyoda  
Name (3) Ryota Nomura  
Name (4) Kazuhiko Nakano  
Name (5) Misa Takegami  
Name (6) Masafumi Ihara

#### Print Name

Name (7) \_\_\_\_\_  
Name (8) \_\_\_\_\_  
Name (9) \_\_\_\_\_  
Name (10) \_\_\_\_\_  
Name (11) \_\_\_\_\_  
Name (12) \_\_\_\_\_

### New Authorship

All authors must sign below agreeing to the changes in authorship. The authorship order must reflect the authorship order of the manuscript.

|                                 |                                                                                                       |                            |
|---------------------------------|-------------------------------------------------------------------------------------------------------|----------------------------|
| Name (1) <u>Jin Nakahara</u>    | Signature <u></u> | Date <u>June. 20. 2020</u> |
| Name (2) <u>Norihiro Suzuki</u> | Signature _____                                                                                       | Date _____                 |
| Name (3) <u>Masatoshi Koga</u>  | Signature _____                                                                                       | Date _____                 |
| Name (4) <u>Kazunori Toyoda</u> | Signature _____                                                                                       | Date _____                 |
| Name (5) <u>Ryota Nomura</u>    | Signature _____                                                                                       | Date _____                 |
| Name (6) <u>Kazuhiko Nakano</u> | Signature _____                                                                                       | Date _____                 |
| Name (7) <u>Misa Takegami</u>   | Signature _____                                                                                       | Date _____                 |
| Name (8) <u>Masafumi Ihara</u>  | Signature _____                                                                                       | Date _____                 |
| Name (9) _____                  | Signature _____                                                                                       | Date _____                 |
| Name (10) _____                 | Signature _____                                                                                       | Date _____                 |
| Name (11) _____                 | Signature _____                                                                                       | Date _____                 |
| Name (12) _____                 | Signature _____                                                                                       | Date _____                 |

Please scan and email to [stroke@strokeahajournal.org](mailto:stroke@strokeahajournal.org).

## Change of Authorship Form

---

(Must be completed and signed by ALL authors)

Please check all that apply

New author(s) have been added (in addition to this form, all new authors must complete the copyright transfer agreement and conflict of interest disclosure.

Change in order of authorship.

An author wishes to remove his/her name. An author's name may only be removed his/her own request and a letter signed by the author should accompany this form

Manuscript Number STROKE/2020/029607R1

Manuscript Title Oral carriage of Streptococcus mutans harboring the cnm gene relates to an increased incidence of cerebral microbleeds

### Former Authorship

Please list ALL AUTHORS in the same order as the original submission. For more than 12, use an extra sheet.

#### Print Name

Name (1) Masatoshi Koga  
Name (2) Kazunori Toyoda  
Name (3) Ryota Nomura  
Name (4) Kazuhiko Nakano  
Name (5) Misa Takegami  
Name (6) Masafumi Ihara

#### Print Name

Name (7) \_\_\_\_\_  
Name (8) \_\_\_\_\_  
Name (9) \_\_\_\_\_  
Name (10) \_\_\_\_\_  
Name (11) \_\_\_\_\_  
Name (12) \_\_\_\_\_

### New Authorship

All authors must sign below agreeing to the changes in authorship. The authorship order must reflect the authorship order of the manuscript.

|                                 |                                  |                          |
|---------------------------------|----------------------------------|--------------------------|
| Name (1) <u>Jin Nakahara</u>    | Signature _____                  | Date _____               |
| Name (2) <u>Norihiro Suzuki</u> | Signature <u>Norihiro Suzuki</u> | Date <u>Jan 23, 2020</u> |
| Name (3) <u>Masatoshi Koga</u>  | Signature _____                  | Date _____               |
| Name (4) <u>Kazunori Toyoda</u> | Signature _____                  | Date _____               |
| Name (5) <u>Ryota Nomura</u>    | Signature _____                  | Date _____               |
| Name (6) <u>Kazuhiko Nakano</u> | Signature _____                  | Date _____               |
| Name (7) <u>Misa Takegami</u>   | Signature _____                  | Date _____               |
| Name (8) <u>Masafumi Ihara</u>  | Signature _____                  | Date _____               |
| Name (9) _____                  | Signature _____                  | Date _____               |
| Name (10) _____                 | Signature _____                  | Date _____               |
| Name (11) _____                 | Signature _____                  | Date _____               |
| Name (12) _____                 | Signature _____                  | Date _____               |

Please scan and email to [stroke@strokeahajournal.org](mailto:stroke@strokeahajournal.org).

## Change of Authorship Form

(Must be completed and signed by ALL authors)

Please check all that apply

New author(s) have been added (in addition to this form, all new authors must complete the copyright transfer agreement and conflict of interest disclosure).

Change in order of authorship.

An author wishes to remove his/her name. An author's name may only be removed his/her own request and a letter signed by the author should accompany this form

Manuscript Number STROKE/2020/029607R1

Manuscript Title Oral carriage of Streptococcus mutans harboring the cnm gene relates to an increased incidence of cerebral microbleeds

### Former Authorship

Please list ALL AUTHORS in the same order as the original submission. For more than 12, use an extra sheet.

#### Print Name

Name (1) Masatoshi Koga  
Name (2) Kazunori Toyoda  
Name (3) Ryota Nomura  
Name (4) Kazuhiko Nakano  
Name (5) Misa Takegami  
Name (6) Masafumi Ihara

#### Print Name

Name (7) \_\_\_\_\_  
Name (8) \_\_\_\_\_  
Name (9) \_\_\_\_\_  
Name (10) \_\_\_\_\_  
Name (11) \_\_\_\_\_  
Name (12) \_\_\_\_\_

### New Authorship

All authors must sign below agreeing to the changes in authorship. The authorship order must reflect the authorship order of the manuscript.

|                                 |                                  |                           |
|---------------------------------|----------------------------------|---------------------------|
| Name (1) <u>Jin Nakahara</u>    | Signature _____                  | Date _____                |
| Name (2) <u>Norihiro Suzuki</u> | Signature _____                  | Date _____                |
| Name (3) <u>Masatoshi Koga</u>  | Signature <u>M. Koga</u>         | Date <u>June 19, 2020</u> |
| Name (4) <u>Kazunori Toyoda</u> | Signature <u>Kazunori Toyoda</u> | Date <u>June 19, 2020</u> |
| Name (5) <u>Ryota Nomura</u>    | Signature _____                  | Date _____                |
| Name (6) <u>Kazuhiko Nakano</u> | Signature _____                  | Date _____                |
| Name (7) <u>Misa Takegami</u>   | Signature <u>Misa Takegami</u>   | Date <u>June 19, 2020</u> |
| Name (8) <u>Masafumi Ihara</u>  | Signature <u>M. Ihara</u>        | Date <u>June 16, 2020</u> |
| Name (9) _____                  | Signature _____                  | Date _____                |
| Name (10) _____                 | Signature _____                  | Date _____                |
| Name (11) _____                 | Signature _____                  | Date _____                |
| Name (12) _____                 | Signature _____                  | Date _____                |

Please scan and email to [stroke@strokeahajournal.org](mailto:stroke@strokeahajournal.org).



## Change of Authorship Form

(Must be completed and signed by ALL authors)

Please check all that apply

New author(s) have been added (in addition to this form, all new authors must complete the copyright transfer agreement and conflict of interest disclosure.

Change in order of authorship.

An author wishes to remove his/her name. An author's name may only be removed his/her own request and a letter signed by the author should accompany this form

Manuscript Number STROKE/2020/029607R1

Manuscript Title Oral carriage of Streptococcus mutans harboring the crm gene relates to an increased incidence of cerebral microbleeds

### Former Authorship

Please list ALL AUTHORS in the same order as the original submission. For more than 12, use an extra sheet.

#### Print Name

Name (1) Masatoshi Koga  
Name (2) Kazunori Toyoda  
Name (3) Ryota Nomura  
Name (4) Kazuhiko Nakano  
Name (5) Misa Takegami  
Name (6) Masafumi Ihara

#### Print Name

Name (7) \_\_\_\_\_  
Name (8) \_\_\_\_\_  
Name (9) \_\_\_\_\_  
Name (10) \_\_\_\_\_  
Name (11) \_\_\_\_\_  
Name (12) \_\_\_\_\_

### New Authorship

All authors must sign below agreeing to the changes in authorship. The authorship order must reflect the authorship order of the manuscript.

|                                 |                               |                           |
|---------------------------------|-------------------------------|---------------------------|
| Name (1) <u>Jin Nakahara</u>    | Signature _____               | Date _____                |
| Name (2) <u>Norihiro Suzuki</u> | Signature _____               | Date _____                |
| Name (3) <u>Masatoshi Koga</u>  | Signature _____               | Date _____                |
| Name (4) <u>Kazunori Toyoda</u> | Signature _____               | Date _____                |
| Name (5) <u>Ryota Nomura</u>    | Signature <u>Ryota Nomura</u> | Date <u>June 19, 2020</u> |
| Name (6) <u>Kazuhiko Nakano</u> | Signature <u>K. Nakano</u>    | Date <u>June 19, 2020</u> |
| Name (7) <u>Misa Takegami</u>   | Signature _____               | Date _____                |
| Name (8) <u>Masafumi Ihara</u>  | Signature _____               | Date _____                |
| Name (9) _____                  | Signature _____               | Date _____                |
| Name (10) _____                 | Signature _____               | Date _____                |
| Name (11) _____                 | Signature _____               | Date _____                |
| Name (12) _____                 | Signature _____               | Date _____                |

Please scan and email to [stroke@strokeahajournal.org](mailto:stroke@strokeahajournal.org).
